# Supplementary material for: Gadgets and Messenger Applications as an Instrument for Secondary School Administration
Source: Hindawi journal article supplement (doi:10.1155/2021/5519942), 2021-05-10
Supplement: f1 [file 5519942.f1.pdf]

# Опитування для керівників ЗЗСО- використання гаджетів в управлінні- грудень 2020

Опитування для керівників закладів загальної середньої освіти.

Опитування проводиться в межах наукової роботи кафедри креативної педагогіки і інтелектуальної власності Української інженерно-педагогічної академії. Опитування є анонімні. ДЯКУЄМО за участь. ПОЯСНЕННЯ: на запитання анкети відповідають тільки директори ЗЗСО та їх заступники.

\* Required

1. Ваша посада \*

*Mark only one oval.*

- ☐ Директор ЗЗСО
- ☐ Заступник директора ЗЗСО

2. Ваша стать \*

*Mark only one oval.*

- ☐ Чоловік
- ☐ Жінка

3. Ваш вік

*Mark only one oval.*

☐ 20-30

☐ 30-40

☐ 40-50

☐ 50-60

☐ 60 і більше

4. На території якої області України Ви працюєте \*

*Mark only one oval.*

- ☐ Вінницька область
- ☐ Волинська область
- ☐ Дніпропетровська область
- ☐ Донецька область
- ☐ Житомирська область
- ☐ Закарпатська область
- ☐ Запорізька область
- ☐ Івано-Франківська область
- ☐ Київська область
- ☐ Кіровоградська область
- ☐ Луганська область
- ☐ Львівська область
- ☐ Миколаївська область
- ☐ Одеська область
- ☐ Полтавська область
- ☐ Рівненська область
- ☐ Сумська область
- ☐ Тернопільська область
- ☐ Харківська область
- ☐ Херсонська область
- ☐ Хмельницька область
- ☐ Черкаська область
- ☐ Чернівецька область
- ☐ Чернігівська область
- ☐ АР КРИМ
- ☐ м.Київ
- ☐ м.Севастополь

5. Чи користуєтесь Ви у своїй управлінській діяльності сучасними гаджетами? \*

*Mark only one oval.*

- ☐ Так
- ☐ Ні
- ☐ Іноді

6. Якщо так, то з якою метою? \*

*Check all that apply.*

- ☐ Надання доручень окремим працівникам
- ☐ Інформувння окремих працівників
- ☐ Створення груп із підпорядковнаих вам працівників і їх інформування

7. Яким додатком-месенджером Ви переважно користуєтесь ? \*

*Mark only one oval.*

- ☐ Viber
- ☐ Skype
- ☐ Facebook Messenger
- ☐ Telegram
- ☐ WhatsApp

8. Ви використовуєте гаджети для трансляції управлінських рішень тільки в робочий час чи цілодобово? \*

*Mark only one oval.*

- ☐ Тільки в робочий час
- ☐ Цілодобово

9. Чи поліпшило використання гаджетів якість управлінської діяльності? \*

*Mark only one oval.*

- ☐ Так
- ☐ Ні
- ☐ Не маю однозначної відповіді

10. Якщо використання гаджетів поліпшило управлінську діяльність, то в якій мірі?

*Mark only one oval.*

|                       |                       |                       |                       |                       |                       |                       |                       |                       |                       |
|-----------------------|-----------------------|-----------------------|-----------------------|-----------------------|-----------------------|-----------------------|-----------------------|-----------------------|-----------------------|
| 1                     | 2                     | 3                     | 4                     | 5                     | 6                     | 7                     | 8                     | 9                     | 10                    |
| <input type="radio"/> |

11. Чи зачіпає, з Вашої точки зору, використання гаджетів в управлінській діяльності особистий простір працівників і їх особистий час? \*

*Mark only one oval.*

- ☐ Так
- ☐ Ні
- ☐ Не маю однозначної відповіді

12. Чи нервуйте Ви в разі коли підлеглі працівники ігнорують Ваші вказіки надіслані шляхом використання гаджетів? \*

*Mark only one oval.*

- ☐ Так
- ☐ Ні
- ☐ Не маю однозначної відповіді

13. Чи наголошуєте Ви при проведенні нарад на необхідності читати Ваші вказівки надісланні на гаджети? \*

*Mark only one oval.*

- ☐ Так
- ☐ Ні
- ☐ Інколи

14. Чи надсилаєте Ви накази по ЗЗСО на гаджети підлеглих працівників \*

*Mark only one oval.*

- ☐ Так
- ☐ Ні
- ☐ Інколи

15. Чи існує у Вас певна система щодо використання гаджетів в управлінні ЗЗСО \*

*Mark only one oval.*

- ☐ Так
- ☐ Ні

16. Якщо так кратко опишіть її основні принципи, алгоритм використання тощо.

---

---

---

---

---

17. На скільки зменшилось проведення очних нарад у Вашому ЗЗСО через використання гаджетів? (один інтервал на шкалі дорівнює 10%) \*

*Mark only one oval.*

|                       |                       |                       |                       |                       |                       |                       |                       |                       |                       |
|-----------------------|-----------------------|-----------------------|-----------------------|-----------------------|-----------------------|-----------------------|-----------------------|-----------------------|-----------------------|
| 1                     | 2                     | 3                     | 4                     | 5                     | 6                     | 7                     | 8                     | 9                     | 10                    |
| <input type="radio"/> |

18. Чи використовують органи управління освітою гаджети для роботи з Вами, як керівником ЗЗСО? \*

*Mark only one oval.*

- ☐ Так
- ☐ Ні
- ☐ Інколи

19. Як Ви до цього відноситися?

*Mark only one oval.*

- ☐ Позитивно
- ☐ Негативно
- ☐ Мені байдуже

20. Якому способу надання інформації від органів управління Ви надаєте перевагу

*Mark only one oval.*

- ☐ Шляхом використання додатків-месенджерів
- ☐ Електронною поштою
- ☐ Традиційним засобам
- ☐ Інше

21. Оцініть за 10 бальною шкалою вплив сучасних гаджетів на якість управління ЗЗСО.

*Mark only one oval.*

|                       |                       |                       |                       |                       |                       |                       |                       |                       |                       |
|-----------------------|-----------------------|-----------------------|-----------------------|-----------------------|-----------------------|-----------------------|-----------------------|-----------------------|-----------------------|
| 1                     | 2                     | 3                     | 4                     | 5                     | 6                     | 7                     | 8                     | 9                     | 10                    |
| <input type="radio"/> |

---

This content is neither created nor endorsed by Google.

Google Forms
